# Supplementary material for: Polyglutamine Aggregate Structure In Vitro and In Vivo; New Avenues for Coherent Anti-Stokes Raman Scattering Microscopy
Source: PubMed Central journal article supplement (PMC3401212; doi:10.1371/journal.pone.0040536), 2012-07-20

(a)

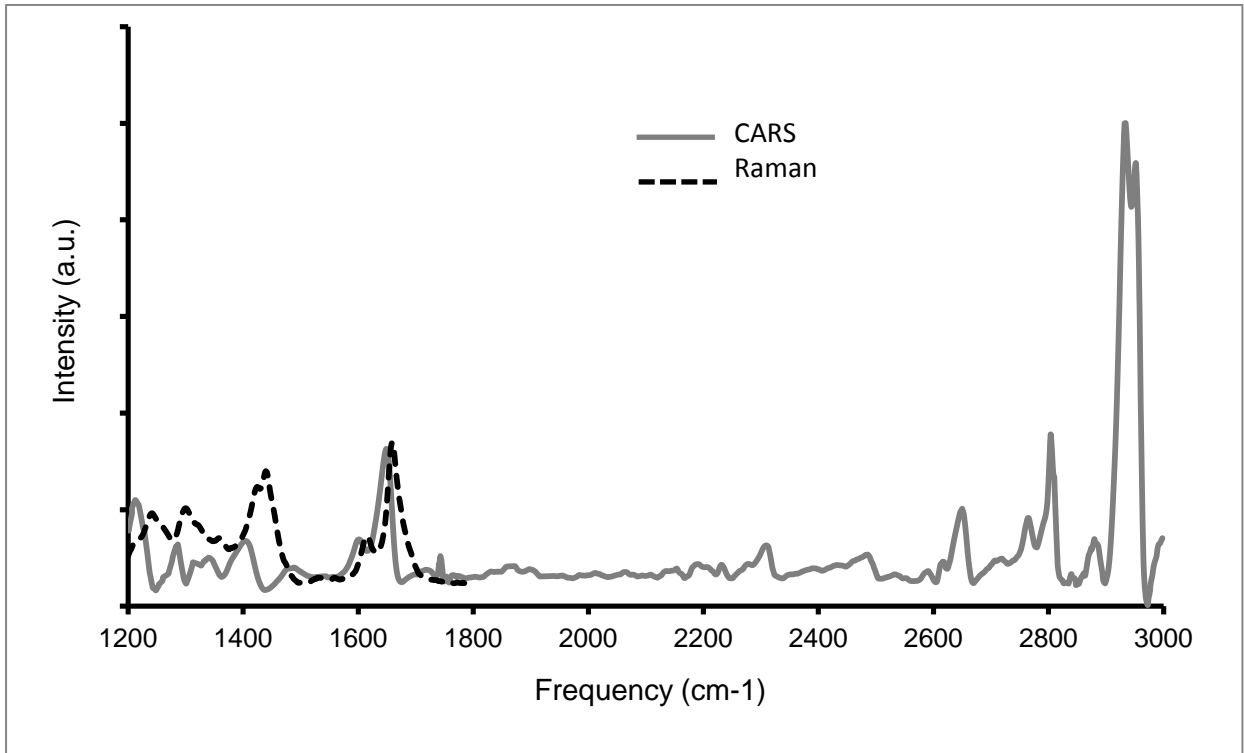

(b)

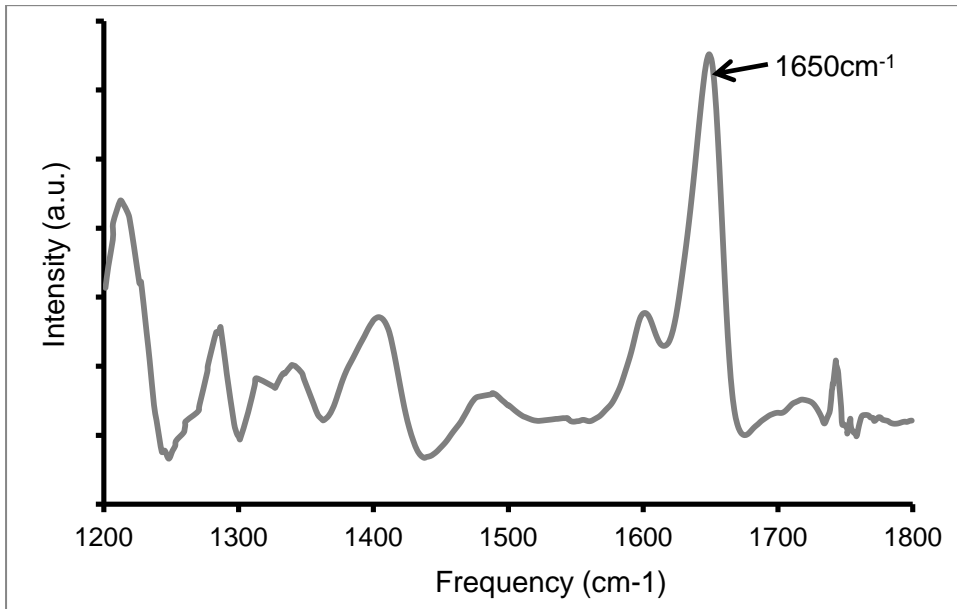

Supplement: pone.0040536.s003.pdf [file pone.0040536.s003.pdf]
